# Supplementary material
Source: PubMed Central journal article supplement (PMC3347270)
Supplement: supp_86.10.5686_TableS1-S2.pdf [file supp_86.10.5686_TableS1-S2.pdf]

Table S1 List of clinical isolates of EV71

| Virus | Strain                      | Place (prefecture) | Year | Clinical diagnosis or symptoms        | Subgenogroup | Accession No. |
|-------|-----------------------------|--------------------|------|---------------------------------------|--------------|---------------|
| EV71  | Y90-2913                    | Yamagata           | 1990 | NA <sup>a</sup>                       | C1           | AB433862      |
| EV71  | Y90-3761                    | Yamagata           | 1990 | NA                                    | C1           | AB433864      |
| EV71  | Y90-3205                    | Yamagata           | 1990 | NA                                    | B2           | AB433863      |
| EV71  | Y90-3896                    | Yamagata           | 1990 | NA                                    | C1           | AB433865      |
| EV71  | Y93-2008                    | Yamagata           | 1993 | NA                                    | B2           | AB433866      |
| EV71  | Y97-0865                    | Yamagata           | 1997 | Upper respiratory infection           | C2           | AB433867      |
| EV71  | Y97-1055                    | Yamagata           | 1997 | HFMD <sup>b</sup> , Upper respiratory | C2           | AB433868      |
| EV71  | Y97-1188                    | Yamagata           | 1997 | HFMD                                  | C2           | AB433870      |
| EV71  | 671-Yamagata-98             | Yamagata           | 1998 | HFMD                                  | C2           | AB213614      |
| EV71  | 705-Yamagata-98             | Yamagata           | 1998 | HFMD                                  | C2           | AB213615      |
| EV71  | 932-Yamagata-99             | Yamagata           | 1999 | HFMD                                  | C2           | AB213616      |
| EV71  | 957-Yamagata-99             | Yamagata           | 1999 | HFMD                                  | C2           | AB213617      |
| EV71  | 983-Yamagata-99             | Yamagata           | 1999 | HFMD,Encephalitis                     | C2           | AB213618      |
| EV71  | 1002-Yamagata-99            | Yamagata           | 1999 | HFMD                                  | C2           | AB213619      |
| EV71  | 738-Yamagata-00             | Yamagata           | 2000 | HFMD                                  | B4           | AB213620      |
| EV71  | 739-Yamagata-00             | Yamagata           | 2000 | HFMD                                  | B4           | AB213621      |
| EV71  | 786-Yamagata-00             | Yamagata           | 2000 | HFMD                                  | B4           | AB213622      |
| EV71  | 934-Yamagata-00             | Yamagata           | 2000 | HFMD                                  | B4           | AB177809      |
| EV71  | 962-Yamagata-00             | Yamagata           | 2000 | HFMD                                  | B4           | AB213623      |
| EV71  | 980-Yamagata-00             | Yamagata           | 2000 | HFMD                                  | B4           | AB213624      |
| EV71  | 1067-Yamagata-00            | Yamagata           | 2000 | HFMD                                  | B4           | AB213625      |
| EV71  | 1084-Yamagata-00            | Yamagata           | 2000 | HFMD                                  | B4           | AB213626      |
| EV71  | 1116-Yamagata-00            | Yamagata           | 2000 | HFMD                                  | C2           | AB177810      |
| EV71  | 1141-Yamagata-00            | Yamagata           | 2000 | HFMD                                  | B4           | AB177811      |
| EV71  | 1945-Shimane-00             | Shimane            | 2000 | HFMD                                  | B4           |               |
| EV71  | 1958-Shimane-00             | Shimane            | 2000 | HFMD                                  | B4           |               |
| EV71  | 2193-Shimane-00             | Shimane            | 2000 | HFMD                                  | C1           |               |
| EV71  | 2326-Shimane-00             | Shimane            | 2000 | Meningitis                            | B5           |               |
| EV71  | 2906-Shimane-00             | Shimane            | 2000 | HFMD                                  | C1           |               |
| EV71  | 75-Aichi-00 (JP02/Ac/00)    | Aichi              | 2000 | HFMD                                  | C4           | HQ676189      |
| EV71  | 10102-Aichi-00              | Aichi              | 2000 | HFMD                                  | B4           |               |
| EV71  | 10417-Aichi-00              | Aichi              | 2000 | HFMD                                  | B4           |               |
| EV71  | 10567-Aichi-00              | Aichi              | 2000 | HFMD                                  | B4           |               |
| EV71  | 10669-Aichi-00 (JP05/Ac/00) | Aichi              | 2000 | HFMD                                  | B4           | HQ676192      |
| EV71  | 10745-Aichi-00              | Aichi              | 2000 | HFMD                                  | B4           |               |
| EV71  | 1585-Yamagata-01            | Yamagata           | 2001 | HFMD                                  | C2           | AB177812      |
| EV71  | 1695-Yamagata-01            | Yamagata           | 2001 | Herpangina                            | C2           | AB213627      |
| EV71  | 1814-Yamagata-01            | Yamagata           | 2001 | HFMD                                  | C2           | AB213628      |
| EV71  | 110-Shimane-01              | Shimane            | 2001 | HFMD                                  | C1           |               |
| EV71  | 111-Shimane-01              | Shimane            | 2001 | HFMD                                  | C1           |               |
| EV71  | 595-Aichi-00 (JP03/Ac/01)   | Aichi              | 2001 | Diarrhea                              | B4           | HQ676190      |
| EV71  | 637-Aichi-00 (JP04/Ac/01)   | Aichi              | 2001 | HFMD                                  | B4           | HQ676191      |
| EV71  | 2779-Yamagata-02            | Yamagata           | 2002 | Viral exanthem                        | C4           | AB213629      |
| EV71  | 75-Yamagata-03              | Yamagata           | 2003 | HFMD                                  | C4           | AB177813      |
| EV71  | 100-Yamagata-03             | Yamagata           | 2003 | HFMD                                  | C4           | AB177814      |
| EV71  | 452-Yamagata-03             | Yamagata           | 2003 | HFMD                                  | C4           | AB213630      |
| EV71  | 638-Yamagata-03             | Yamagata           | 2003 | HFMD                                  | C4           | AB213631      |
| EV71  | 828-Yamagata-03             | Yamagata           | 2003 | Influenza-like illness                | C4           | AB213632      |
| EV71  | 944-Yamagata-03             | Yamagata           | 2003 | HFMD                                  | C4           | AB213633      |
| EV71  | 946-Yamagata-03             | Yamagata           | 2003 | HFMD                                  | C4           | AB213634      |
| EV71  | 1144-Yamagata-03            | Yamagata           | 2003 | HFMD                                  | C4           | AB213635      |
| EV71  | 1268-Yamagata-03            | Yamagata           | 2003 | HFMD                                  | C4           | AB213636      |
| EV71  | 1469-Yamagata-03            | Yamagata           | 2003 | HFMD                                  | C4           | AB213637      |
| EV71  | 1530-Yamagata-03            | Yamagata           | 2003 | HFMD                                  | C4           | AB213638      |
| EV71  | 1716-Yamagata-03            | Yamagata           | 2003 | HFMD                                  | C4           | AB213639      |
| EV71  | 1725-Yamagata-03            | Yamagata           | 2003 | HFMD                                  | C4           | AB213640      |
| EV71  | 1799-Yamagata-03            | Yamagata           | 2003 | HFMD                                  | C4           | AB213641      |
| EV71  | 1897-Yamagata-03            | Yamagata           | 2003 | HFMD                                  | C4           | AB213642      |
| EV71  | 2091-Yamagata-03            | Yamagata           | 2003 | HFMD                                  | C4           | AB213643      |
| EV71  | 2316-Yamagata-03            | Yamagata           | 2003 | HFMD                                  | C4           | AB213644      |
| EV71  | 2321-Yamagata-03            | Yamagata           | 2003 | HFMD                                  | C4           | AB213645      |
| EV71  | 2399-Yamagata-03            | Yamagata           | 2003 | HFMD                                  | C4           | AB213646      |
| EV71  | 2419-Yamagata-03            | Yamagata           | 2003 | HFMD                                  | B5           | AB213647      |
| EV71  | 2542-Yamagata-03            | Yamagata           | 2003 | HFMD                                  | B5           | AB177815      |
| EV71  | 2716-Yamagata-03            | Yamagata           | 2003 | HFMD                                  | B5           | AB177816      |
| EV71  | 2933-Yamagata-03            | Yamagata           | 2003 | HFMD                                  | B5           | AB213648      |
| EV71  | 2934-Yamagata-03            | Yamagata           | 2003 | HFMD                                  | B5           | AB213649      |
| EV71  | 2972-Yamagata-03            | Yamagata           | 2003 | HFMD                                  | B5           | AB213650      |
| EV71  | N803-Sendai.H-03            | Miyagi             | 2003 | HFMD                                  | C4           |               |
| EV71  | N826-Sendai.H-03            | Miyagi             | 2003 | HFMD                                  | C4           |               |
| EV71  | N830-Sendai.H-03            | Miyagi             | 2003 | HFMD                                  | C4           |               |
| EV71  | N960-Sendai.H-03            | Miyagi             | 2003 | Herpes stomatitis                     | C4           |               |
| EV71  | N961-Sendai.H-03            | Miyagi             | 2003 | HFMD                                  | C1           |               |
| EV71  | 1365-Shimane-03             | Shimane            | 2003 | HFMD                                  | B5           |               |
| EV71  | 1440-Shimane-03             | Shimane            | 2003 | HFMD                                  | B5           |               |
| EV71  | 1573-Shimane-03             | Shimane            | 2003 | HFMD                                  | B5           |               |
| EV71  | 1647-Shimane-03             | Shimane            | 2003 | Meningitis                            | B5           |               |
| EV71  | 1902-Shimane-03             | Shimane            | 2003 | HFMD                                  | B5           |               |
| EV71  | 1970-Shimane-03             | Shimane            | 2003 | HFMD                                  | B5           |               |
| EV71  | 216-Aichi-03                | Aichi              | 2003 | None                                  | B5           |               |
| EV71  | 368-Aichi-03 (JP06/Ac/03)   | Aichi              | 2003 | HFMD                                  | C1           | HQ676193      |
| EV71  | 10054-Aichi-03              | Aichi              | 2003 | HFMD                                  | C1           |               |
| EV71  | 10128-Aichi-03              | Aichi              | 2003 | HFMD                                  | B5           |               |

|      |                             |          |      |                             |    |          |
|------|-----------------------------|----------|------|-----------------------------|----|----------|
| EV71 | 10135-Aichi-03              | Aichi    | 2003 | HFMD                        | C1 |          |
| EV71 | 10184-Aichi-03 (JP07/Ac/03) | Aichi    | 2003 | HFMD                        | C1 | HQ676194 |
| EV71 | 10204-Aichi-03              | Aichi    | 2003 | HFMD                        | B5 |          |
| EV71 | N781-Sendai.H-04            | Miyagi   | 2004 | HFMD                        | C2 |          |
| EV71 | 10289-Aichi-04 (JP08/Ac/04) | Aichi    | 2004 | HFMD                        | B5 | HQ676195 |
| EV71 | 268-Aichi-05 (JP09/Ac/05)   | Aichi    | 2005 | HFMD                        | C4 | HQ676196 |
| EV71 | 342-Aichi-05                | Aichi    | 2005 | HFMD                        | C4 |          |
| EV71 | 343-Aichi-05                | Aichi    | 2005 | HFMD                        | C4 |          |
| EV71 | 10375-Aichi-05 (JP10/Ac/05) | Aichi    | 2005 | HFMD                        | C4 | HQ676197 |
| EV71 | 2147-Yamagata-06            | Yamagata | 2006 | HFMD                        | C4 | AB433871 |
| EV71 | 2293-Yamagata-06            | Yamagata | 2006 | HFMD                        | C4 | AB433872 |
| EV71 | 2317-Yamagata-06            | Yamagata | 2006 | HFMD                        | C4 | AB433873 |
| EV71 | 2404-Yamagata-06            | Yamagata | 2006 | HFMD                        | C4 | AB433875 |
| EV71 | 2488-Yamagata-06            | Yamagata | 2006 | HFMD                        | C4 | AB433876 |
| EV71 | 2498-Yamagata-06            | Yamagata | 2006 | HFMD                        | C4 | AB433874 |
| EV71 | 2753-Yamagata-06            | Yamagata | 2006 | HFMD                        | C4 | AB433877 |
| EV71 | 2928-Yamagata-06            | Yamagata | 2006 | HFMD                        | C4 | AB433878 |
| EV71 | N133-Sendai.H-06            | Miyagi   | 2006 | HFMD                        | C4 |          |
| EV71 | N252-Sendai.H-06            | Miyagi   | 2006 | HFMD                        | C4 |          |
| EV71 | N281-Sendai.H-06            | Miyagi   | 2006 | HFMD                        | C4 |          |
| EV71 | N533-Sendai.H-06            | Miyagi   | 2006 | HFMD                        | C4 |          |
| EV71 | N720-Sendai.H-06            | Miyagi   | 2006 | HFMD                        | C4 |          |
| EV71 | N772-Sendai.H-06            | Miyagi   | 2006 | Herpangina                  | C4 |          |
| EV71 | 773-Shimane-06              | Shimane  | 2006 | HFMD                        | C4 |          |
| EV71 | 774-Shimane-06              | Shimane  | 2006 | HFMD                        | C4 |          |
| EV71 | 778-Shimane-06              | Shimane  | 2006 | Gastroenteritis             | C4 |          |
| EV71 | 817-Shimane-06              | Shimane  | 2006 | Meningitis                  | C4 |          |
| EV71 | 842-Shimane-06              | Shimane  | 2006 | HFMD                        | C4 |          |
| EV71 | 858-Shimane-06              | Shimane  | 2006 | HFMD                        | C4 |          |
| EV71 | 509-Aichi-05                | Aichi    | 2006 | HFMD                        | C4 |          |
| EV71 | 10747-Aichi-06 (JP11/Ac/06) | Aichi    | 2006 | HFMD                        | C4 | HQ676198 |
| EV71 | 390-Aichi-06                | Aichi    | 2006 | HFMD                        | C4 |          |
| EV71 | 10048-Aichi-06              | Aichi    | 2006 | Upper respiratory infection | C4 |          |
| EV71 | 10078-Aichi-06              | Aichi    | 2006 | HFMD                        | C4 |          |
| EV71 | 10155-Aichi-06 (JP12/Ac/06) | Aichi    | 2006 | HFMD                        | C4 | HQ676199 |
| EV71 | 10221-Aichi-06              | Aichi    | 2006 | HFMD                        | C4 |          |
| EV71 | 10291-Aichi-06              | Aichi    | 2006 | HFMD                        | C2 |          |
| EV71 | 10298-Aichi-06              | Aichi    | 2006 | HFMD                        | C2 |          |
| EV71 | 56-Yamagata-07              | Yamagata | 2007 | HFMD                        | C4 | AB433879 |
| EV71 | 114-Yamagata-07             | Yamagata | 2007 | HFMD                        | C4 | AB433880 |
| EV71 | 1431-Yamagata-07            | Yamagata | 2007 | HFMD                        | C4 | AB433881 |
| EV71 | 1569-Yamagata-07            | Yamagata | 2007 | HFMD                        | C4 | AB433884 |
| EV71 | 1571-Yamagata-07            | Yamagata | 2007 | HFMD                        | C4 | AB433882 |
| EV71 | 1638-Yamagata-07            | Yamagata | 2007 | HFMD                        | C4 | AB433885 |
| EV71 | 1667-Yamagata-07            | Yamagata | 2007 | HFMD                        | C4 | AB433883 |
| EV71 | 1693-Yamagata-07            | Yamagata | 2007 | HFMD                        | C4 | AB433886 |
| EV71 | 1694-Yamagata-07            | Yamagata | 2007 | HFMD                        | C4 | AB433888 |
| EV71 | 1758-Yamagata-07            | Yamagata | 2007 | Stomatitis                  | C4 | AB433889 |
| EV71 | 1797-Yamagata-07            | Yamagata | 2007 | HFMD                        | C4 | AB433887 |
| EV71 | 1827-Yamagata-07            | Yamagata | 2007 | Viral exanthem              | C4 | AB433890 |
| EV71 | 1897-Yamagata-07            | Yamagata | 2007 | Acute respiratory infection | C4 | AB433891 |
| EV71 | 1961-Yamagata-07            | Yamagata | 2007 | Viral exanthem              | C4 | AB433892 |
| EV71 | 523-Shimane-07              | Shimane  | 2007 | HFMD                        | C4 |          |
| EV71 | 567-Shimane-07              | Shimane  | 2007 | HFMD                        | C4 |          |
| EV71 | 569-Shimane-07              | Shimane  | 2007 | HFMD                        | C2 |          |
| EV71 | 10342-Aichi-08 (JP13/Ac/08) | Aichi    | 2008 | HFMD                        | C4 | HQ676200 |
| EV71 | 692-Simane-09               | Shimane  | 2009 | HFMD                        | C2 |          |
| EV71 | 720-Shimane-09              | Shimane  | 2009 | HFMD                        | C2 |          |
| EV71 | 788-Shimane-09              | Shimane  | 2009 | HFMD                        | C2 |          |
| EV71 | 46-Aichi-09                 | Aichi    | 2009 | HFMD                        | C2 |          |
| EV71 | 68-Aichi-09 (JP14/Ac/09)    | Aichi    | 2009 | HFMD                        | C2 | HQ676201 |
| EV71 | 291-Aichi-09 (JP15/Ac/09)   | Aichi    | 2009 | HFMD                        | C2 | HQ676202 |
| EV71 | 10811-Aichi-09              | Aichi    | 2009 | HFMD                        | B5 |          |
| EV71 | 384-Sendai.H-10             | Miyagi   | 2010 | HFMD, Status epilepticus    | C2 |          |
| EV71 | K108-Sendai.H-10            | Yamagata | 2010 | NA                          | C2 |          |
| EV71 | K114-Sendai.H-10            | Yamagata | 2010 | NA                          | C2 |          |
| EV71 | K117-Sendai.H-10            | Yamagata | 2010 | NA                          | C2 |          |
| EV71 | N316-Sendai.H-10            | Miyagi   | 2010 | HFMD                        | C2 |          |
| EV71 | N328-Sendai.H-10            | Miyagi   | 2010 | HFMD                        | C2 |          |
| EV71 | 35-Shimane-10               | Shimane  | 2010 | HFMD                        | C2 |          |
| EV71 | 129-Shimane-10              | Shimane  | 2010 | HFMD                        | C2 |          |
| EV71 | 260-Shimane-10              | Shimane  | 2010 | HFMD                        | C2 |          |
| EV71 | 324-Shimane-10              | Shimane  | 2010 | HFMD                        | C2 |          |
| EV71 | 333-Shimane-10              | Shimane  | 2010 | HFMD                        | C2 |          |
| EV71 | 393-Shimane-10              | Shimane  | 2010 | Meningitis                  | C2 |          |
| EV71 | 418-Shimane-10              | Shimane  | 2010 | Myocarditis                 | C2 |          |
| EV71 | 12338-Aichi-10              | Aichi    | 2010 | HFMD                        | C2 |          |
| EV71 | 12389-Aichi-10              | Aichi    | 2010 | Viral exanthema             | B5 |          |
| EV71 | 12395-Aichi-10 (JP17/Ac/10) | Aichi    | 2010 | HFMD                        | C2 | HQ676204 |

<sup>a</sup>Not available

<sup>b</sup>Hand-foot-and-mouth disease

Table S2 List of clinical isolates of Coxsackieviruses

| Virus | Strain           | Place<br>(prefecture) | Year | Clinical diagnosis or<br>symptoms |
|-------|------------------|-----------------------|------|-----------------------------------|
| CVA2  | 1083-Yamagata-01 | Yamagata              | 2001 | Upper respiratory infection       |
| CVA2  | 10204-Aichi-01   | Aichi                 | 2001 | Herpangina                        |
| CVA2  | 10206-Aichi-01   | Aichi                 | 2001 | Herpangina                        |
| CVA2  | 382-Aichi-01     | Aichi                 | 2001 | Herpangina                        |
| CVA2  | 183-Aichi-01     | Aichi                 | 2001 | Herpangina                        |
| CVA2  | 10215-Aichi-03   | Aichi                 | 2003 | Herpangina                        |
| CVA2  | 1454-Yamagata-04 | Yamagata              | 2004 | Upper respiratory infection       |
| CVA2  | 2296-Yamagata-06 | Yamagata              | 2006 | Upper respiratory infection       |
| CVA2  | 1729-Yamagata-08 | Yamagata              | 2008 | Upper respiratory infection       |
| CVA2  | 2436-Yamagata-09 | Yamagata              | 2009 | Herpangina                        |
| CVA3  | 2063-Shimane-90  | Shimane               | 1990 | Herpangina                        |
| CVA3  | 2207-Shimane-90  | Shimane               | 1990 | Herpangina                        |
| CVA3  | 2310-Shimane-90  | Shimane               | 1990 | Herpangina                        |
| CVA3  | 2333-Shimane-90  | Shimane               | 1990 | Pharyngitis                       |
| CVA3  | 2769-Shimane-90  | Shimane               | 1990 | Pharyngitis                       |
| CVA3  | 2897-Shimane-90  | Shimane               | 1990 | Pharyngitis                       |
| CVA3  | 1979-Yamagata-07 | Yamagata              | 2007 | Tonsillitis                       |
| CVA3  | 1550-Yamagata-07 | Yamagata              | 2007 | Upper respiratory infection       |
| CVA3  | 443-Shimane-07   | Shimane               | 2007 | Pharyngitis                       |
| CVA3  | 455-Shimane-07   | Shimane               | 2007 | Herpangina                        |
| CVA3  | 460-Shimane-07   | Shimane               | 2007 | Herpangina                        |
| CVA3  | 465-Shimane-07   | Shimane               | 2007 | Herpangina                        |
| CVA3  | 469-Shimane-07   | Shimane               | 2007 | Herpangina                        |
| CVA3  | 470-Shimane-07   | Shimane               | 2007 | Herpangina                        |
| CVA3  | 472-Shimane-07   | Shimane               | 2007 | Pharyngitis                       |
| CVA3  | 486-Shimane-07   | Shimane               | 2007 | Fever                             |
| CVA3  | 496-Shimane-07   | Shimane               | 2007 | Herpangina                        |
| CVA3  | 509-Shimane-07   | Shimane               | 2007 | Herpangina                        |
| CVA3  | 513-Shimane-07   | Shimane               | 2007 | Herpangina                        |
| CVA3  | 3361-Yamagata-09 | Yamagata              | 2009 | Tonsillitis                       |
| CVA3  | 2397-Yamagata-09 | Yamagata              | 2009 | Upper respiratory infection       |
| CVA3  | 2265-Yamagata-09 | Yamagata              | 2009 | Herpangina                        |
| CVA4  | 1861-Yamagata-01 | Yamagata              | 2001 | Upper respiratory infection       |
| CVA4  | 1761-Yamagata-02 | Yamagata              | 2002 | Upper respiratory infection       |
| CVA4  | 087-Aichi-02     | Aichi                 | 2002 | Herpangina                        |
| CVA4  | 10146-Aichi-02   | Aichi                 | 2002 | Herpangina                        |
| CVA4  | 10168-Aichi-02   | Aichi                 | 2002 | Herpangina                        |
| CVA4  | 10184-Aichi-02   | Aichi                 | 2002 | Herpangina                        |
| CVA4  | 2687-Yamagata-03 | Yamagata              | 2003 | Upper respiratory infection       |
| CVA4  | 10205-Aichi-03   | Aichi                 | 2003 | Herpangina                        |
| CVA4  | 10341-Aichi-05   | Aichi                 | 2005 | Herpangina                        |
| CVA4  | 1830-Yamagata-06 | Yamagata              | 2006 | Herpangina                        |
| CVA4  | 2405-Yamagata-09 | Yamagata              | 2009 | Upper respiratory infection       |
| CVA5  | 1907-Shimane-00  | Shimane               | 2000 | HFMD                              |
| CVA5  | 243-Aichi-01     | Aichi                 | 2001 | Herpangina                        |
| CVA5  | 165-Shimane-02   | Shimane               | 2002 | Exanthema                         |
| CVA5  | 2131-Shimane-02  | Shimane               | 2002 | HFMD                              |
| CVA5  | 438-Shimane-03   | Shimane               | 2003 | HFMD                              |
| CVA5  | 10093-Aichi-03   | Aichi                 | 2003 | Herpangina                        |
| CVA5  | 467-Shimane-06   | Shimane               | 2006 | HFMD                              |
| CVA5  | 677-Shimane-06   | Shimane               | 2006 | Herpangina                        |
| CVA5  | 545-Shimane-07   | Shimane               | 2007 | Herpangina                        |
| CVA5  | 140-Shimane-10   | Shimane               | 2010 | HFMD                              |
| CVA6  | 10243-Aichi-00   | Aichi                 | 2000 | Herpangina                        |

|       |                  |          |      |                             |
|-------|------------------|----------|------|-----------------------------|
| CVA6  | 1908-Shimane-00  | Shimane  | 2000 | HFMD                        |
| CVA6  | 1729-Shimane-01  | Shimane  | 2001 | HFMD                        |
| CVA6  | 0267-Yamagata-02 | Yamagata | 2002 | Upper respiratory infection |
| CVA6  | 10032-Aichi-03   | Aichi    | 2003 | Herpangina                  |
| CVA6  | 1721-Shimane-04  | Shimane  | 2004 | HFMD                        |
| CVA6  | 1413-Yamagata-05 | Yamagata | 2005 | Herpangina                  |
| CVA6  | 1052-Yamagata-05 | Yamagata | 2005 | Upper respiratory infection |
| CVA6  | 422-Shimane-05   | Shimane  | 2005 | HFMD                        |
| CVA6  | 1635-Yamagata-06 | Yamagata | 2006 | Viral exanthem              |
| CVA6  | 514-Shimane-07   | Shimane  | 2007 | HFMD                        |
| CVA6  | 1547-Yamagata-08 | Yamagata | 2008 | Upper respiratory infection |
| CVA6  | 781-Shimane-09   | Shimane  | 2009 | HFMD                        |
| CVA8  | 2167-Shimane-00  | Shimane  | 2000 | Pharyngitis                 |
| CVA8  | 2260-Shimane-00  | Shimane  | 2000 | Pharyngitis                 |
| CVA8  | 2329-Shimane-00  | Shimane  | 2000 | Pharyngitis                 |
| CVA8  | 1493-Shimane-01  | Shimane  | 2001 | Pharyngitis                 |
| CVA8  | 1520-Shimane-01  | Shimane  | 2001 | Pharyngitis                 |
| CVA8  | 1575-Shimane-01  | Shimane  | 2001 | Pharyngitis                 |
| CVA8  | 1615-Shimane-01  | Shimane  | 2001 | Herpangina                  |
| CVA8  | 1638-Shimane-01  | Shimane  | 2001 | Herpangina                  |
| CVA8  | 1659-Shimane-01  | Shimane  | 2001 | Herpangina                  |
| CVA8  | 1665-Shimane-01  | Shimane  | 2001 | Herpangina                  |
| CVA8  | 1694-Shimane-01  | Shimane  | 2001 | Herpangina                  |
| CVA8  | 1810-Shimane-01  | Shimane  | 2001 | Herpangina                  |
| CVA8  | 1904-Shimane-01  | Shimane  | 2001 | Herpangina                  |
| CVA8  | 10205-Aichi-01   | Aichi    | 2001 | Herpangina                  |
| CVA8  | 10226-Aichi-01   | Aichi    | 2001 | Herpangina                  |
| CVA8  | 10234-Aichi-01   | Aichi    | 2001 | Herpangina                  |
| CVA8  | 1817-Shimane-02  | Shimane  | 2002 | Pharyngitis                 |
| CVA10 | 10224-Aichi-01   | Aichi    | 2001 | Herpangina                  |
| CVA10 | 160-Aichi-02     | Aichi    | 2002 | Herpangina                  |
| CVA10 | 161-Aichi-02     | Aichi    | 2002 | Herpangina                  |
| CVA10 | 2002-Yamagata-03 | Yamagata | 2003 | Herpangina                  |
| CVA10 | 1878-Yamagata-03 | Yamagata | 2003 | Upper respiratory infection |
| CVA10 | 1730-Yamagata-03 | Yamagata | 2003 | Herpangina                  |
| CVA10 | 10174-Aichi-03   | Aichi    | 2003 | Herpangina                  |
| CVA10 | 10067-Aichi-05   | Aichi    | 2005 | Herpangina                  |
| CVA10 | 1887-Yamagata-07 | Yamagata | 2007 | HFMD                        |
| CVA10 | 1788-Yamagata-08 | Yamagata | 2008 | Upper respiratory infection |
| CVA12 | 1917-Shimane-02  | Shimane  | 2002 | Herpangina                  |
| CVA12 | 1918-Shimane-02  | Shimane  | 2002 | Pharyngitis                 |
| CVA12 | 1141-Shimane-03  | Shimane  | 2003 | Herpangina                  |
| CVA12 | 1198-Shimane-03  | Shimane  | 2003 | Pharyngitis                 |
| CVA12 | 1315-Shimane-03  | Shimane  | 2003 | Herpangina                  |
| CVA12 | 1317-Shimane-03  | Shimane  | 2003 | Pharyngitis                 |
| CVA12 | 1443-Shimane-03  | Shimane  | 2003 | Herpangina                  |
| CVA12 | 10145-Aichi-03   | Aichi    | 2003 | Herpangina                  |
| CVA12 | 912-Shimane-05   | Shimane  | 2005 | Pharyngitis                 |
| CVA14 | 1060-shimane-85  | Shimane  | 1985 | HFMD                        |
| CVA14 | 1061-shimane-85  | Shimane  | 1985 | HFMD                        |
| CVA14 | 1634-shimane-85  | Shimane  | 1985 | HFMD                        |
| CVA14 | 2394-shimane-91  | Shimane  | 1991 | HFMD                        |
| CVA14 | 2525-shimane-91  | Shimane  | 1991 | Pharyngitis                 |
| CVA14 | 2839-shimane-91  | Shimane  | 1991 | Pharyngitis                 |
| CVA14 | 2854-shimane-91  | Shimane  | 1991 | Pharyngitis                 |
| CVA14 | 1458-shimane-03  | Shimane  | 2003 | Exanthema                   |
| CVA14 | 1484-shimane-03  | Shimane  | 2003 | HFMD                        |

|       |                  |          |      |                             |
|-------|------------------|----------|------|-----------------------------|
| CVA14 | 1592-shimane-03  | Shimane  | 2003 | HFMD                        |
| CVA14 | 1599-shimane-03  | Shimane  | 2003 | Herpangina                  |
| CVA14 | 1639-shimane-03  | Shimane  | 2003 | HFMD                        |
| CVA14 | 1769-shimane-03  | Shimane  | 2003 | Meningitis                  |
| CVA14 | 1982-shimane-03  | Shimane  | 2003 | Pharyngitis                 |
| CVA14 | 0610-Yamagata-05 | Yamagata | 2005 | HFMD                        |
| CVA14 | 0006-Yamagata-05 | Yamagata | 2005 | Upper respiratory infection |
| CVA14 | 10205-Aichi-05   | Aichi    | 2005 | Herpangina                  |
| CVA16 | 2748-Shimane-00  | Shimane  | 2000 | HFMD                        |
| CVA16 | 1540-Yamagata-01 | Yamagata | 2001 | HFMD                        |
| CVA16 | 1120-Yamagata-01 | Yamagata | 2001 | HFMD                        |
| CVA16 | 1922-Shimane-01  | Shimane  | 2001 | HFMD                        |
| CVA16 | 2319-Yamagata-02 | Yamagata | 2002 | HFMD                        |
| CVA16 | 1872-Yamagata-02 | Yamagata | 2002 | HFMD                        |
| CVA16 | 1303-Shimane-02  | Shimane  | 2002 | HFMD                        |
| CVA16 | 2633-Yamagata-03 | Yamagata | 2003 | HFMD                        |
| CVA16 | 10048-Aichi-03   | Aichi    | 2003 | Herpangina                  |
| CVA16 | 10064-Aichi-03   | Aichi    | 2003 | HFMD                        |
| CVA16 | 10088-Aichi-03   | Aichi    | 2003 | HFMD                        |
| CVA16 | 10103-Aichi-03   | Aichi    | 2003 | HFMD                        |
| CVA16 | 10173-Aichi-03   | Aichi    | 2003 | Herpangina                  |
| CVA16 | 2065-Yamagata-04 | Yamagata | 2004 | HFMD                        |
| CVA16 | 1451-Shimane-04  | Shimane  | 2004 | Pharyngitis                 |
| CVA16 | 1668-Shimane-04  | Shimane  | 2004 | HFMD                        |
| CVA16 | 2437-Yamagata-05 | Yamagata | 2005 | Upper respiratory infection |
| CVA16 | 674-Shimane-05   | Shimane  | 2005 | HFMD                        |
| CVA16 | 738-Shimane-05   | Shimane  | 2005 | HFMD                        |
| CVA16 | 2511-Yamagata-06 | Yamagata | 2006 | HFMD                        |
| CVA16 | 3242-Yamagata-06 | Yamagata | 2006 | Upper respiratory infection |
| CVA16 | 264-Shimane-06   | Shimane  | 2006 | HFMD                        |
| CVA16 | 1600-Yamagata-07 | Yamagata | 2007 | HFMD                        |
| CVA16 | 1122-Yamagata-07 | Yamagata | 2007 | Upper respiratory infection |
| CVA16 | 890-Shimane-07   | Shimane  | 2007 | HFMD                        |
| CVA16 | 1817-Yamagata-08 | Yamagata | 2008 | HFMD                        |
| CVA16 | 1386-Yamagata-08 | Yamagata | 2008 | HFMD                        |
| CVA16 | 47-Shimane-08    | Shimane  | 2008 | HFMD                        |
| CVA16 | 10027-Aichi-08   | Aichi    | 2008 | Exanthema                   |
| CVA16 | 10040-Aichi-08   | Aichi    | 2008 | HFMD                        |
| CVA16 | 10101-Aichi-08   | Aichi    | 2008 | HFMD                        |
| CVA16 | 10194-Aichi-08   | Aichi    | 2008 | HFMD                        |
| CVA16 | 10293-Aichi-08   | Aichi    | 2008 | HFMD                        |
| CVA16 | 10338-Aichi-08   | Aichi    | 2008 | HFMD                        |
| CVA16 | 10386-Aichi-08   | Aichi    | 2008 | HFMD                        |
| CVA16 | 10444-Aichi-08   | Aichi    | 2008 | HFMD                        |
| CVA16 | 2077-Yamagata-09 | Yamagata | 2009 | HFMD                        |
